# Supplementary material for: Graphene-supported [{Ru4O4(OH)2(H2O)4}(γ-SiW10O36)2]10− for highly efficient electrocatalytic water oxidation
Source: Royal Society of Chemistry journal article supplement (doi:10.1039/c3ee41892h), 2013-01-01
Supplement: c3ee41892h.pdf [file c3ee41892h.pdf]

## Supporting Information

# Graphene-Supported $[\{\text{Ru}_4\text{O}_4(\text{OH})_2(\text{H}_2\text{O})_4\}(\gamma\text{-SiW}_{10}\text{O}_{36})_2]^{10-}$ for Highly Efficient Electrocatalytic Water Oxidation

Si-Xuan Guo,<sup>a</sup> Yuping Liu,<sup>a</sup> Chong-Yong Lee,<sup>a</sup> Alan M. Bond,<sup>\*a</sup> Jie Zhang,<sup>\*a</sup> Yurii V. Geletii,<sup>b</sup>

Craig L. Hill<sup>\*b</sup>

<sup>a</sup> School of Chemistry, Monash University, Clayton, Vic 3800, Australia, E-mails:

[alan.bond@monash.edu](mailto:alan.bond@monash.edu), [jie.zhang@monash.edu](mailto:jie.zhang@monash.edu)

<sup>b</sup> Department of Chemistry, Emory University, Atwood Hall 525, Atlanta, GA 30322, USA, E-mail:

[chill@emory.edu](mailto:chill@emory.edu)

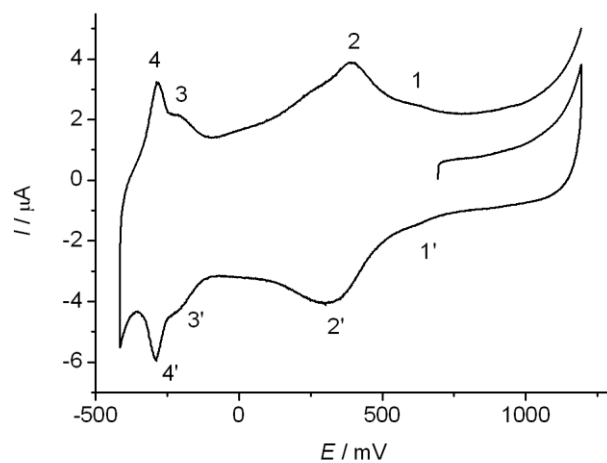

**Figure S1.** Cyclic voltammogram obtained in 0.5 M H<sub>2</sub>SO<sub>4</sub> with a wet graphene modified electrode (details given in text). Scan rate: 50 mV s<sup>-1</sup>.

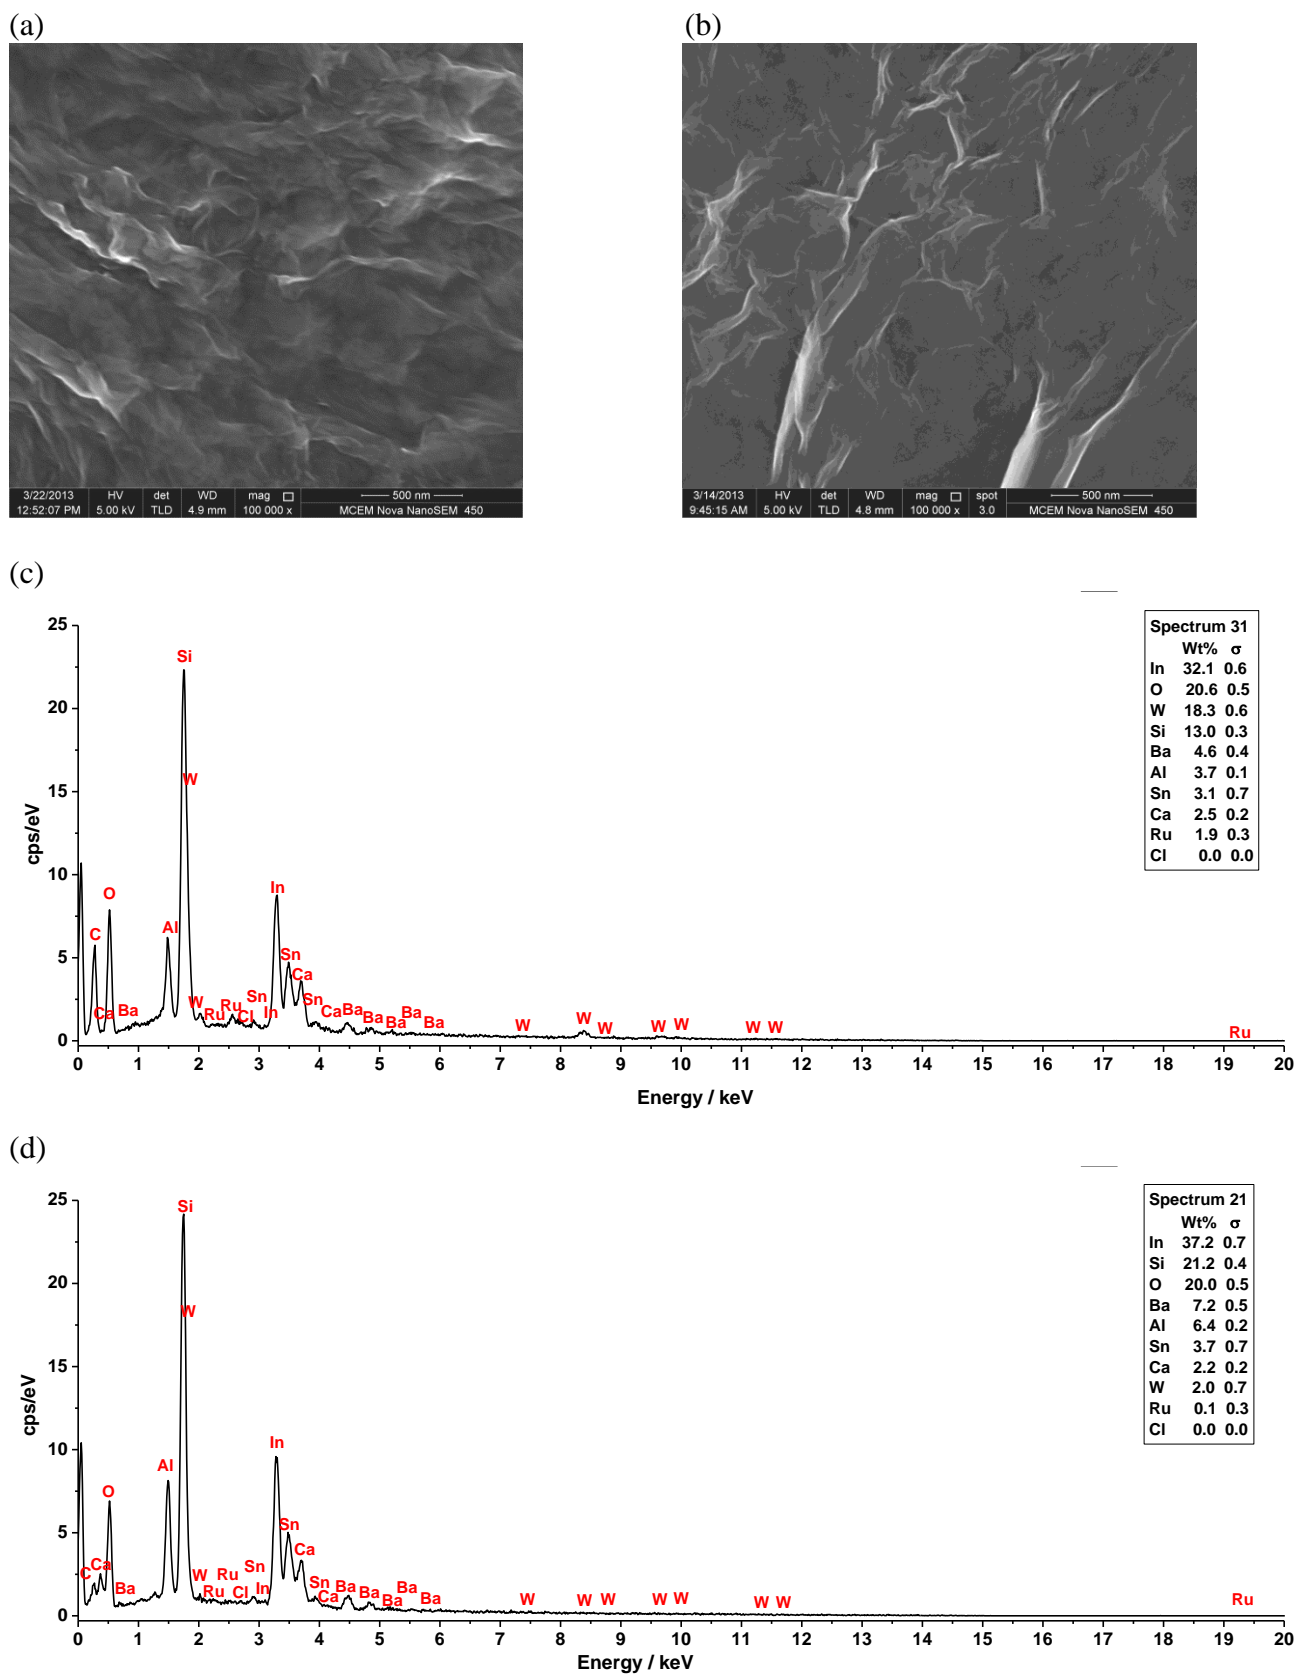

**Figure S2.** SEM images and EDX spectra obtained from a **1**-graphene modified electrode (a and c) and a **1**-dry graphene modified electrode (b and d).

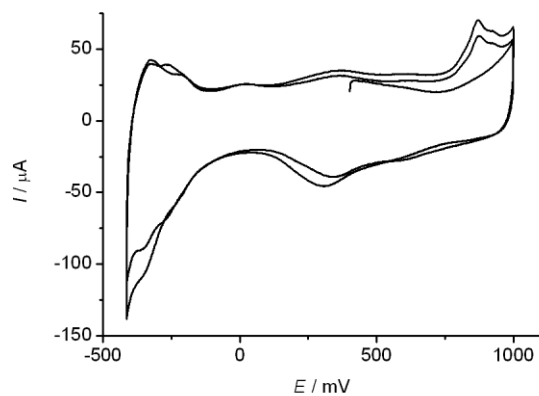

**Figure S3.** Cyclic voltammograms obtained with a **1**-graphene modified electrode in 0.5 M H<sub>2</sub>SO<sub>4</sub>. Scan rate: 50 mV s<sup>-1</sup>. Graphene deposition: 30 cycles of potential between 0 and -1.4 V (vs. Ag/AgCl, 3 M NaCl) in 1 mg ml<sup>-1</sup> graphene oxide (0.05 M Na<sub>2</sub>HPO<sub>4</sub>) at a scan rate of 50 mV s<sup>-1</sup>.

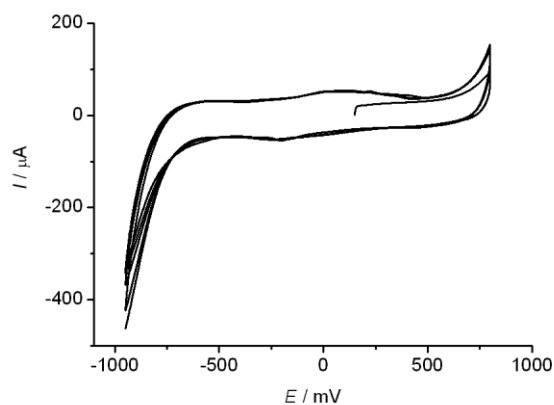

**Figure S4.** Cyclic voltammograms obtained with a **1**-graphene modified electrode in 0.1 M borate buffer containing 1 M Ca(NO<sub>3</sub>)<sub>2</sub>, pH 7.50. Scan rate: 50 mV s<sup>-1</sup>. Graphene deposition: 30 cycles of potential between 0 and -1.4 V (vs. Ag/AgCl, 3 M NaCl) in 1 mg ml<sup>-1</sup> graphene oxide (0.05 M Na<sub>2</sub>HPO<sub>4</sub>) at a scan rate of 50 mV s<sup>-1</sup>.

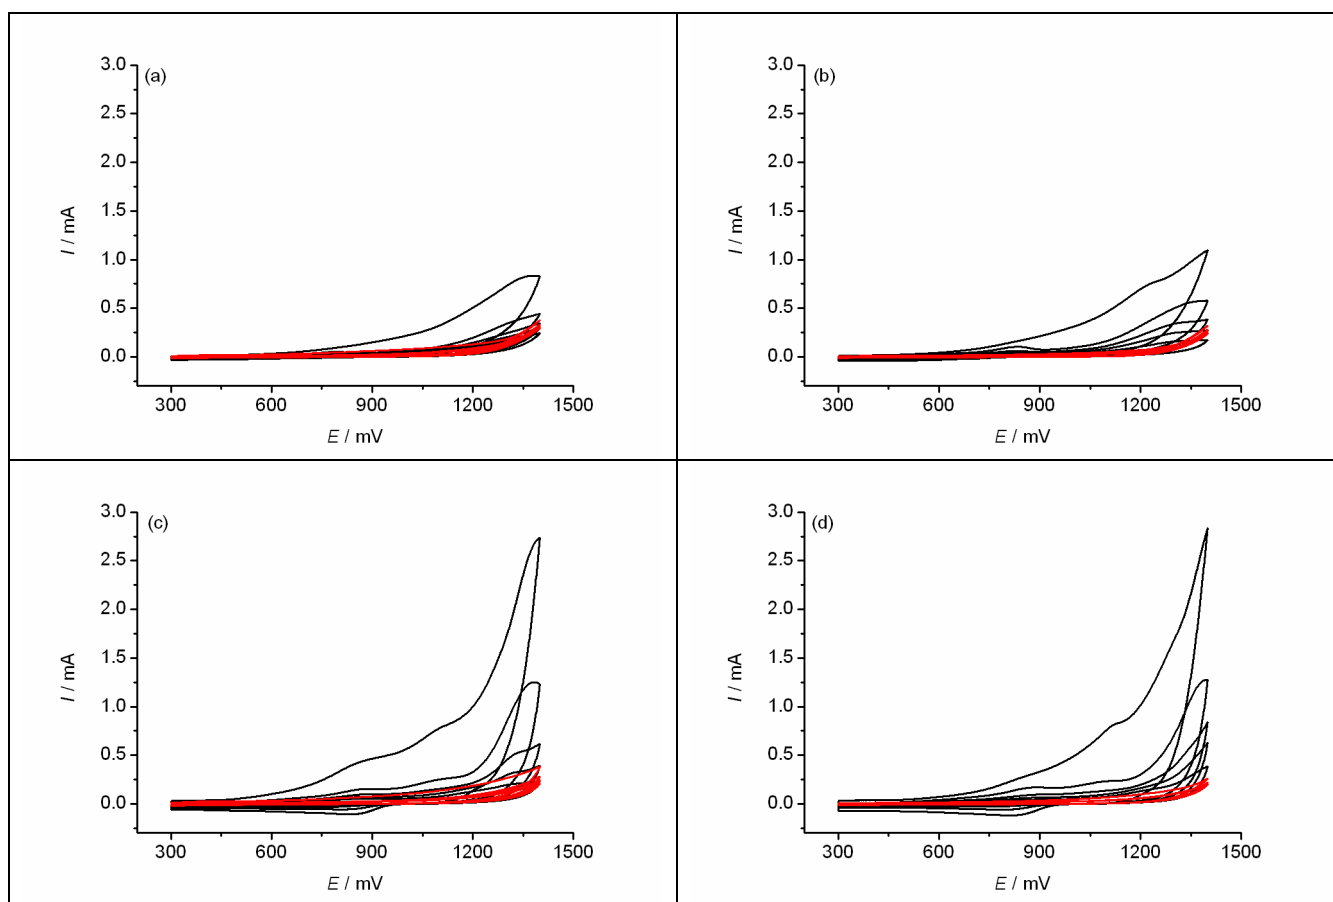

**Figure S5.** Electrocatalytic water oxidation using a **1**-graphene modified electrode (—) or a graphene modified electrode (—) in 0.1 M sodium phosphate buffer, pH 7.50, in the absence (a) and presence of additional supporting electrolyte (b) 0.1 M LiClO<sub>4</sub>, (c) 1 M NaNO<sub>3</sub> and (d) 1 M KNO<sub>3</sub>.

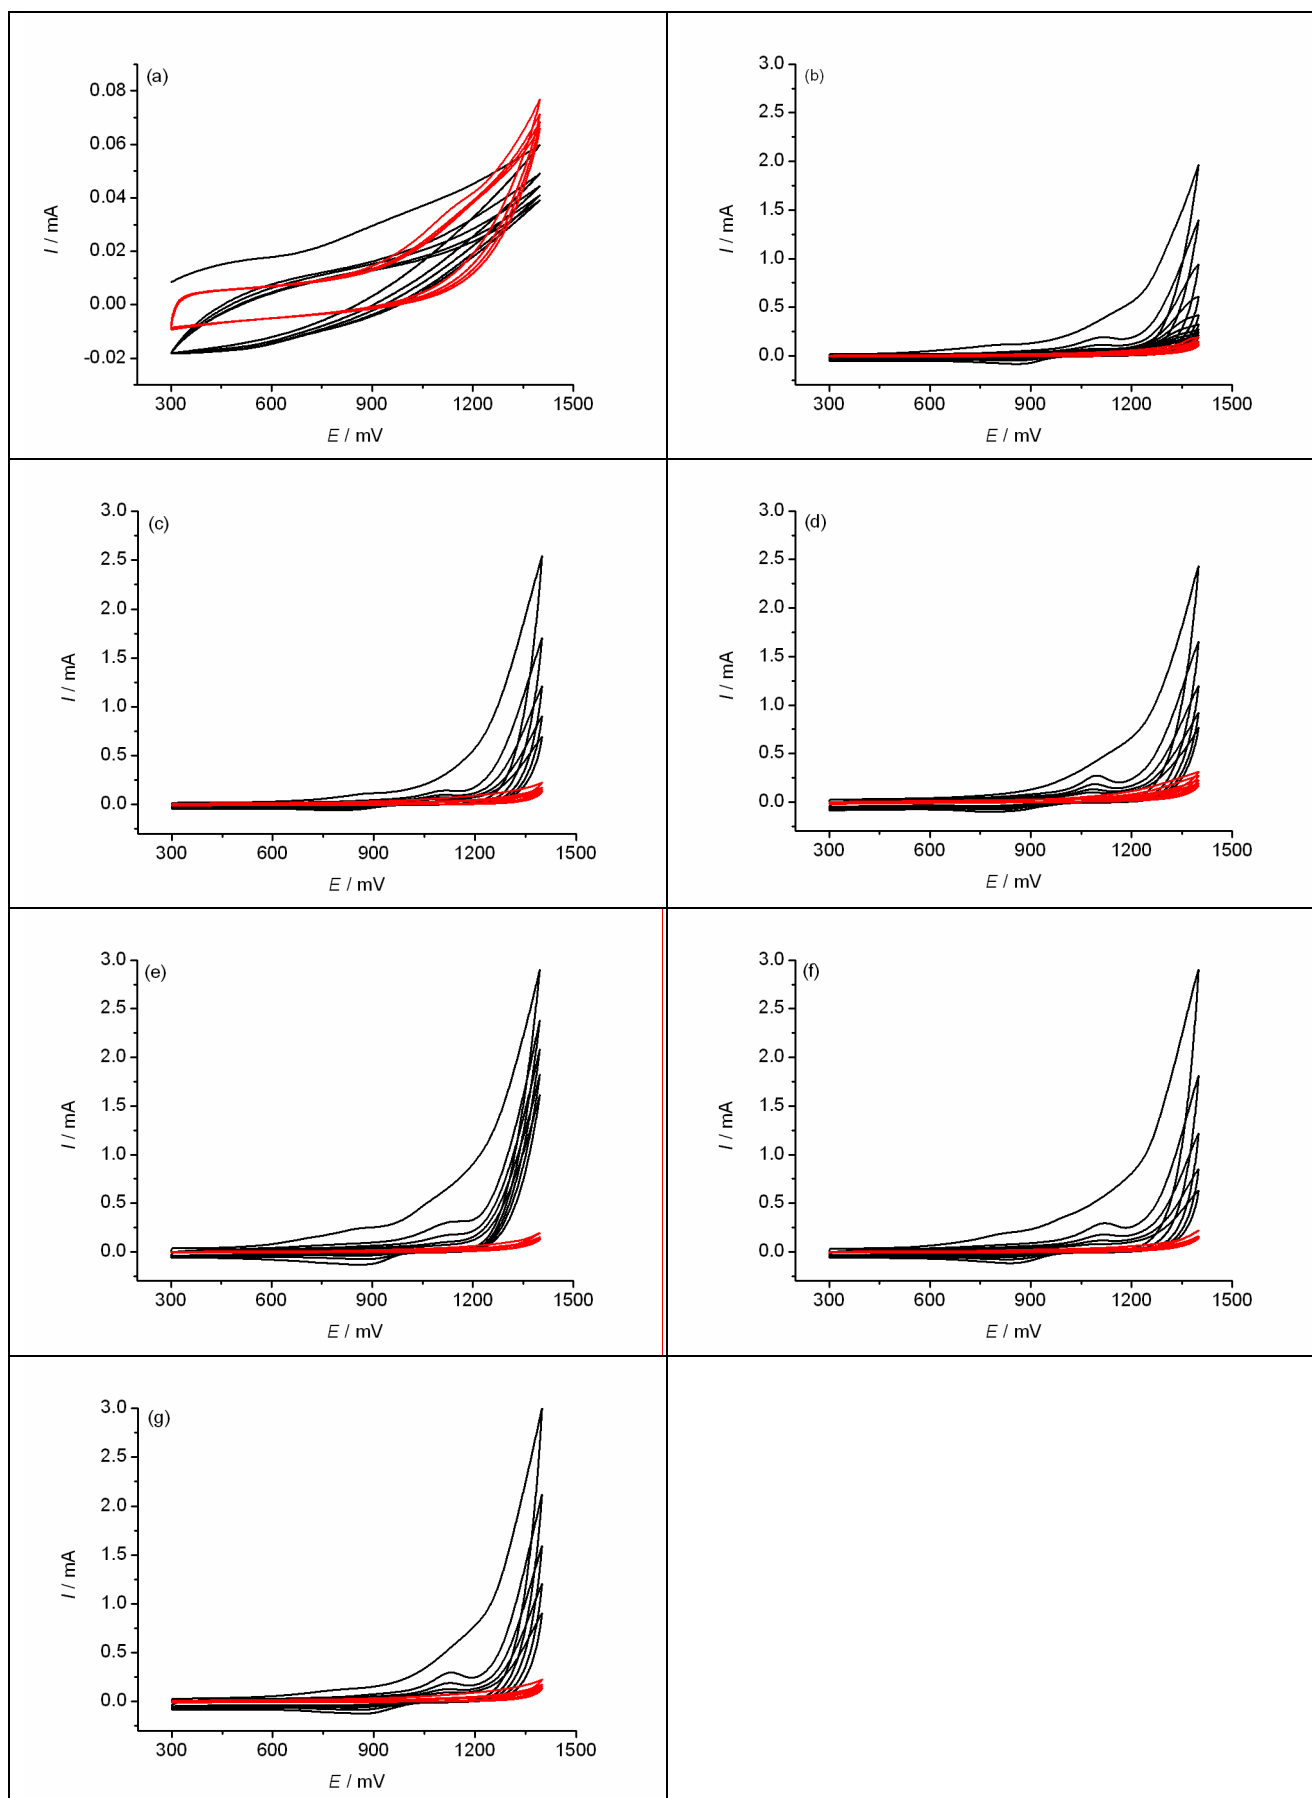

**Figure S6.** Electrocatalytic water oxidation using a 1-graphene modified electrode (—) or a graphene modified electrode (—) in 0.1 M sodium borate buffer, pH 7.50 in the absence (a) and presence of additional supporting electrolyte (b) 1 M LiNO<sub>3</sub>, (c) 1 M NaNO<sub>3</sub>, (d) 1 M KNO<sub>3</sub>, (e) 1 M Ca(NO<sub>3</sub>)<sub>2</sub>, (f) 1 M Mg(NO<sub>3</sub>)<sub>2</sub> and (g) 2 M NaNO<sub>3</sub>.

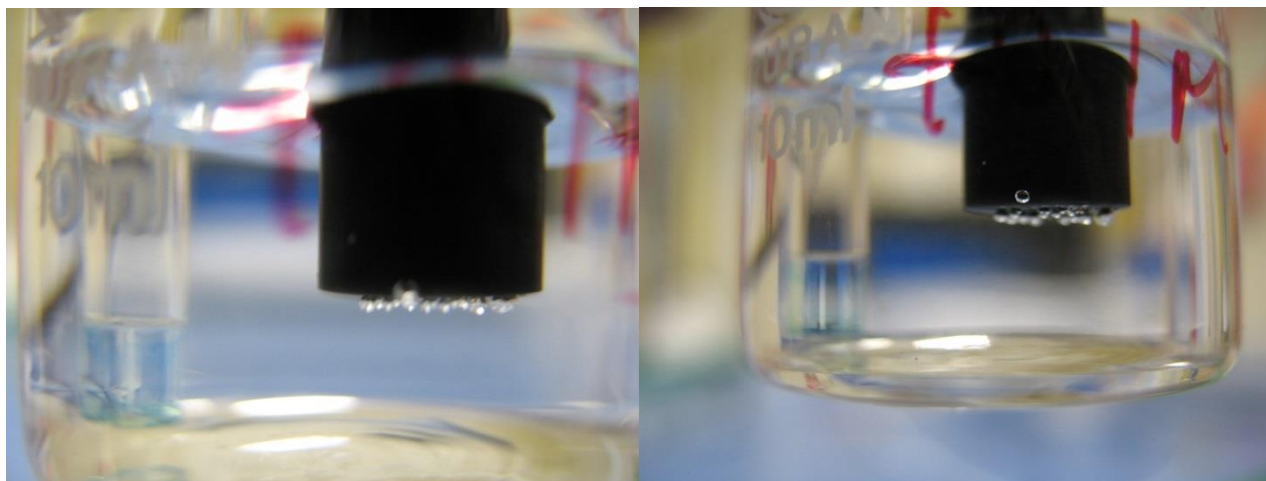

**Figure S7.** Photographs showing oxygen gas bubbles formed after the potential was cycled 5 times between +300 and +1400 mV vs. Ag/AgCl at a scan rate of  $50 \text{ mV s}^{-1}$  when using a **1**-graphene modified GC electrode with 0.1 M sodium borate buffer (pH 7.50) containing 0.1 M  $\text{LiClO}_4$  as the aqueous supporting electrolyte.

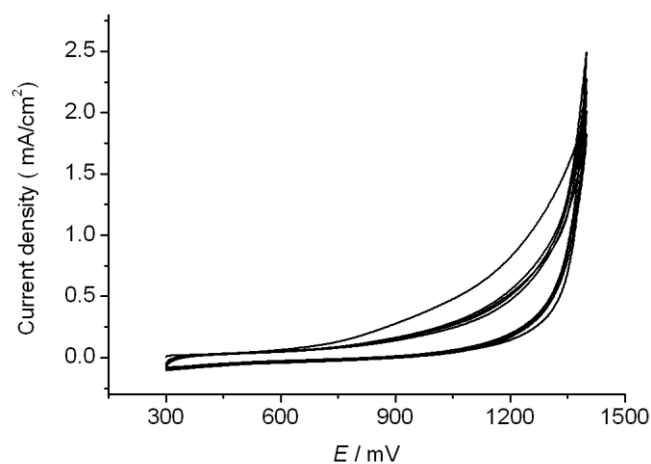

**Figure S8.** Electrocatalytic water oxidation using a **1**-dry graphene modified electrode in 0.1 M sodium borate buffer, pH 7.50 with 1 M  $\text{Ca}(\text{NO}_3)_2$  as the additional supporting electrolyte (5 cycles of potential). Scan rate:  $50 \text{ mV s}^{-1}$ .

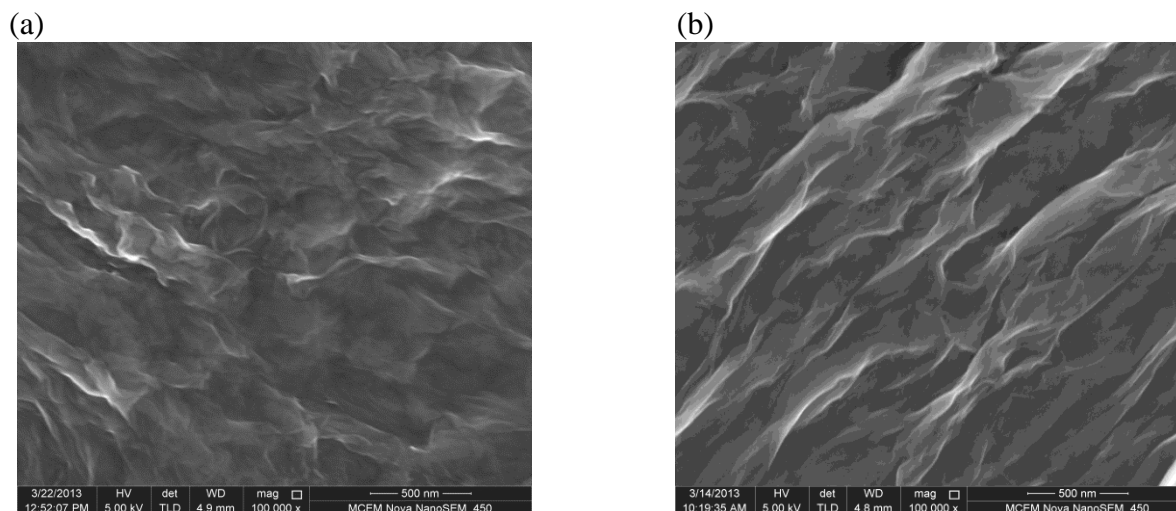

**Figure S9.** SEM images of a 1-graphene modified ITO electrode taken before (a) and after (b) a constant potential electrolysis at 1.3 V for 500 s. For better comparison, only half of the 1-graphene modified ITO electrode was in contact with the electrolyte solution during electrolysis. SEM images were taken at both electrolyzed and un-electrolyzed parts of the modified electrode.

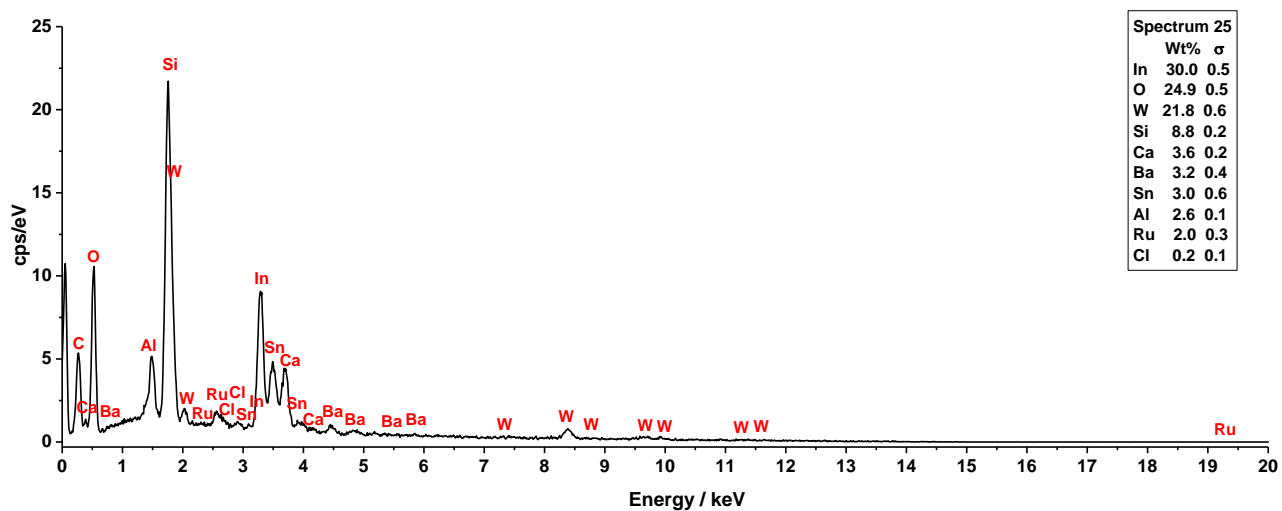

**Figure S10.** EDX spectrum of a 1-graphene modified ITO electrode taken after the control potential electrolysis at 1.3 V for 500 s.



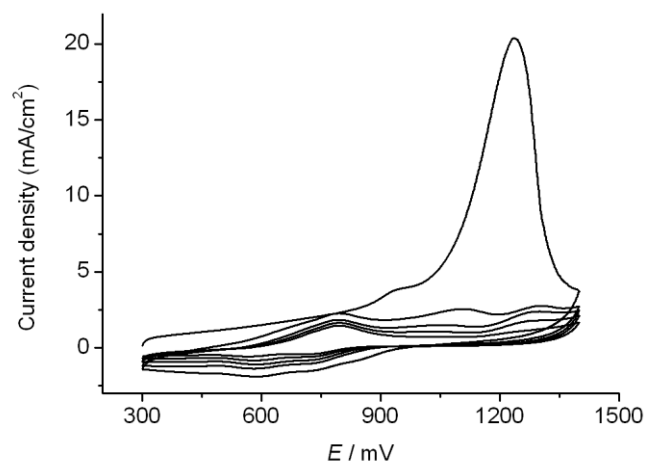

**Figure S11.** Cyclic voltammogram obtained at a RuO<sub>2</sub>-graphene modified glassy carbon electrode (fabricated using drop casting method with 5  $\mu$ L of 2.7 mg/ml RuO<sub>2</sub>). Experimental conditions are the same as Figure 3.

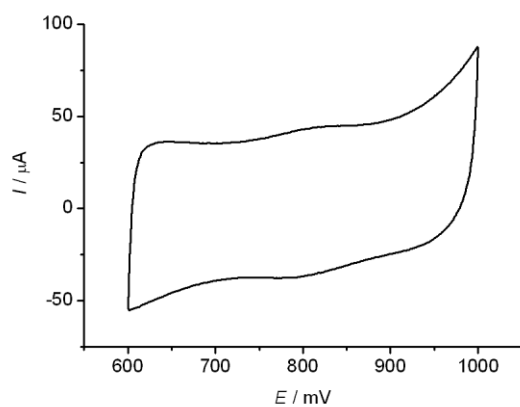

**Figure S12.** Cyclic voltammogram of **1**-graphene modified RRDE electrode obtained in 0.1 M HCl containing 1 M Ca(NO<sub>3</sub>)<sub>2</sub>, scan rate: 50 mV s<sup>-1</sup>.
